# Supplementary material for: Gene-Expression Profiling of Mucinous Ovarian Tumors and Comparison with Upper and Lower Gastrointestinal Tumors Identifies Markers Associated with Adverse Outcomes
Source: Clin Cancer Res. 2022 Oct 7;28(24):5383–95. doi: 10.1158/1078-0432.CCR-22-1206 (PMC9751776; doi:10.1158/1078-0432.CCR-22-1206)
Supplement: Supplementary Tables S1-S11 [file ccr-22-1206_supplementary_tables_s1-s11_suppts1-ts11.xlsx]

## Sheet: S1 studies
Table S1: Validation cohort study sites
Study site	Tumor type/s	Name	Location	Years	Ascertainment of Patients and Clinical Data	Ethics committee	Informed consent
AOV	Ovary	Alberta Ovarian Tumor Types Study	Canada	1978-2010	Population-based Alberta Cancer Registry; annual updates are performed for vital statistics	Alberta Health Services, Research Ethics	No, waiver for archival pathology material
BAV	Ovary	Bavarian Ovarian Cancer Cases and Controls	Germany	2002-2006	Gynaecologic Oncology Center at the Comprehensive Cancer Center Erlangen-Nuremberg	Ethics Committee of the Friedrich-Alexander-University Erlangen-Nuremberg	Yes
DOV	Ovary	Diseases of the Ovary and their Evaluation	USA	2002-2009	13 counties from western Washington SEER registry	Fred Hutchinson Cancer Research Center Institutional Review Board	Yes
GAM	Ovary	Genomic Analysis of Mucinous Tumours study	Australia	2000-2011	Australian Ovarian Cancer Study, Hudson Institute of Medical Research (VIC), Edinburgh Cancer Research Centre (UK)	Peter MacCallum Cancer Centre HREC	Yes
HSA	Ovary and GI	Health Science Alliance Biobank	Australia	2012-present	Prince of Wales Hospital, Royal Hospital for Women, St George Hospital, Sydney NSW. Survival data Australian Institute of Health and Welfare	South-Eastern Sydney Local Health District	Yes
KCF	Ovary	KConFab	Australia	1997 - present	Genetic Clinics Australia and New Zealand	Peter MacCallum Cancer Centre Human Ethics Committee	Yes
KRA	Ovary	Korean Epithelial oVarian cancEr study (KoEVE)	Korea	2010-2016	7 general hospitals with gynecologists; Seoul National University hospital, Samsung Medical Center, Asan Medical Center, National Cancer Center, Gangnam Severance hospital, Kyung Hee University hospital at Gangdong, and Cheil General hospital	Seoul National University Institutional Review Board (IRB)	Yes
NCO	Ovary	North Carolina	USA	1999-2007	North Carolina Central Cancer Registry	The Duke University Health System Institutional Review Board for Clinical Investigations (DUHS IRB)	Yes
POC	Ovary	Polish Ovarian Cancer Study	Poland	2000-2003	Hospital records and cancer registries serving Warsaw and Lodz	Bioethical Committee of Pomeranian Medical University	Yes
PRM	Ovary	PrOMark study	USA	2012-present	Gynecologic Oncology clinics at UPMC serving western Pennsylvania	University of Pittsburgh Institutional Review Board	Yes
PVD	Ovary	Pelvic Mass Study	Denmark	2004 - 2010	Gynecologic Clinic, University Hospital of Copenhagen, Rigshospitalet	Danish National Committee for Research Ethics, Capital Region	Yes
SEA	Ovary	Study of Epidemiology and Risk Factors in Cancer Heredity	UK	1998-present	Eastern Region Cancer Intelligence Unit, West Midlands Cancer Intelligence Unit, and multiple cancer networks	Cambridgeshire 4 Research Ethics Committee	Yes
SWE	Ovary	Sweden Western Region Ovarian Cancer Study	Sweden	2001-2016	Sahlgrenska University Hosptial, medical records and the clinical cancer register in the western Sweden health care region and Swedish death register	Swedish Ethical Review Authority	Yes
TUE	Ovary	Tuebingen University Women's Hospital study	Germany	1999-2008	Department of Obstetrics and Gynaecology, Eberhard Karls Universitats Tübingen, Tübingen Germany	Ethics-Committee at the Medical Faculty and at the University Hospital of Tübingen	Yes
ULA	Ovary	UCLA	USA	2004 - 2019	University of California, Los Angeles (UCLA), Department of Obstetrics and Gynecology, Division of Gynecologic Oncology. Los Angeles, CA	UCLA Office of the Human Research Protection Program	No, waiver for archival pathology material. (UCLA IRB Review Not Required)
USC	Ovary	Los Angeles County Case-Control Study of Ovarian Cancer	USA	1992-2008	Los Angeles County SEER Program	Institutional Review Board Health Research Association and Institutional Review Board University of Southern California School of Medicine	Yes
VAN	Ovary	Vancouver Ovarian Cancer Study	Canada	1984-2000	Ovarian Cancer Registry serving British Columbia and the Cheryl Brown Outcomes Unit	University of British Columbia - British Columbia Cancer Agency Research Ethics Board	Some cases Yes and some cases No / pathology material
VIP	Ovary	Variants in Practice study	Australia	2012-present	Parkville Familial Cancer Centre, Peter MacCallum Cancer Centre and Royal Melbourne Hospital, VIC; Familial Cancer Centre, Monash Health, Vic; Clinical Genetics Service, Austin Health, Vic; Family Cancer Clinic, Cabrini Health, Vic; Familial Cancer Centre, Barwon Health, Vic; Tasmanian Clinical Genetics Service, Tas	Peter MacCallum Cancer Centre Ethics Committee	Yes
WAG	Ovary	Western Australia Group	Australia	2013-present	St John of God Hospital, Subiaco, WA and King Edward Memorial Hospital, Perth WA	St John of God Healthcare Human Research Ethics Committee and the Women and Newborn Human Research Ethics Committee	Yes
WMH	Ovary	Westmead Hospital, Gynaecological Oncology Biobank (GynBiobank)	Australia	1992-present	The Crown Princess Mary Cancer Centre and affiliated hospitals	Western Sydney Local Health District, Human Research Ethics Committee	Yes
APG	Pancreas	Australian Pancreatic Genome Initiative	Australia	1992-2014	Multiple hospitals. Please see: https://www.pancreaticcancer.net.au/about-collaborators/	St Vincent's Hospital	Yes
MCO	Colorectal	Molecular and Cellular Oncology Biobank	Australia		St Vincent's Hospital Sydney	St Vincent's Hospital	Yes
PDA	Pancreas	PDAC tissue micoarray	Canada	2010-2018	Alberta Health Services	Health Research Ethics Board of Alberta Cancer Committee	No, waiver for archival pathology material

## Sheet: S2 diagnosis discordance
Table S2 original and pathology review diagnosis of patients with excluded samples due to discordance
Excluded due to discordant diagnosis following review
		Review diagnosis
		Benign	MBOT	MOC	LGI	UGI	Mets (unk primary)	Total
Case diagnosis	MBOT			6	2			8
	MOC	3			9	5	13	30
	LGI		2	4		1		7
	UGI		1					1
	Mets (unk primary)						8	8
	Total	3	3	10	11	6	21	54

## Sheet: S3 assay probes
Table S3: Sequence of probes on NanoString plexset
HUGO Gene	Target Sequence	Flag	Tag
DNAH6	TGAGCAACATAAACTCATCTACAGCTTTATGCTTTGTGTTGAGATGATGCGTCAGCAAGGAACCCTATCTGATGCTGAATGGAATTTCTTTCTCCGAGGT	Housekeeping	T001
LDHA	AACTTCCTGGCTCCTTCACTGAACATGCCTAGTCCAACATTTTTTCCCAGTGAGTCACATCCTGGGATCCAGTGTATAAATCCAATATCATGTCTTGTGC	Housekeeping	T002
MTG1	TGTGTGTTAAAGCTGCTCTCACCAGTGAAACCTAAGAAATGAGCAGGTTGGCAGCTAGGGTTTGTGTTGGAGGCTTTCGGTCCAGTGTCTTGCAGTCCTA	Housekeeping	T003
POLR1B	GGAGAACTCGGCCTTAGAATACTTTGGTGAGATGTTAAAGGCTGCTGGCTACAATTTCTATGGCACCGAGAGGTTATATAGTGGCATCAGTGGGCTAGAA	Housekeeping	T004
TBP	ACAGTGAATCTTGGTTGTAAACTTGACCTAAAGACCATTGCACTTCGTGCCCGAAACGCCGAATATAATCCCAAGCGGTTTGCTGCGGTAATCATGAGGA	Housekeeping	T005
ANXA10	TTGTGGAGACTATGTGCAAGGAACCATCTTCCCAGCTCCCAATTTCAATCCCATAATGGATGCCCAAATGCTAGGAGGAGCACTCCAAGGATTTGACTGT	Endogenous	T006
CD274	GGATACTTCTGAACAAGGAGCCTCCAAGCAAATCATCCATTGCTCATCCTAGGAAGACGGGTTGAGAATCCCTAATTTGAGGGTCAGTTCCTGCAGAAGT	Endogenous	T007
CLDN18	GAAAGTCCTCACATCAATAGTACATATGAAAGTGACCTCCAAGGGGATTGGTGAATACTCATAAGGATCTTCAGGCTGAACAGACTATGTCTGGGGAAAG	Endogenous	T008
DCN	ATCATCCTCCTTCTGCTTGCACAAGTTTCCTGGGCTGGACCGTTTCAACAGAGAGGCTTATTTGACTTTATGCTAGAAGATGAGGCTTCTGGGATAGGCC	Endogenous	T009
ERBB2	CTGAAAGAGACGGAGCTGAGGAAGGTGAAGGTGCTTGGATCTGGCGCTTTTGGCACAGTCTACAAGGGCATCTGGATCCCTGATGGGGAGAATGTGAAAA	Endogenous	T010
GKN1	CCTGATGTACTCAGTCAACCCAAACAAAGTCGATGACCTGAGCAAGTTCGGAAAAAACATTGCAAACATGTGTCGTGGGATTCCAACATACATGGCTGAG	Endogenous	T011
KRT20	ACAGTCGTGCAAGAAGTAGTGGATGGCAAGGTCGTGTCATCTGAAGTCAAAGAGGTGGAAGAAAATATCTAAATAGCTACCAGAAGGAGATGCTGCTGAG	Endogenous	T012
MEP1A	ATTTCAGTGCCATTGATTTAGAGAGGCTGAACCGAATGTACAATTGCACCACAACTCACACTCTTTTGGACCACTGTACTTTTGAGAAGGCAAACATCTG	Endogenous	T013
MUC16	GGTACCCAGCTGCAGAACTTCACCCTGGACAGGAGCAGTGTCCTTGTGGATGGGTATTCTCCCAACAGAAATGAGCCCTTAACTGGGAATTCTGACCTTC	Endogenous	T014
MUC2	GGAGCAGCTAGGCCAGAAGGTGCAGTGTGATGTCTCTGTTGGGTTCATTTGCAAGAATGAAGACCAGTTTGGAAATGGACCATTTGGACTGTGTTACGAC	Endogenous	T015
MUC5AC	CAGTGGGGAAGTGTTCCTGAACCAGATCTACACCCAGCTGCCCATCTCTGCAGCCAACGTCACCATCTTCAGACCCTCAACCTTCTTCATCATCGCCCAG	Endogenous	T016
PDCD1	CTTCTTCCCAGCCCTGCTCGTGGTGACCGAAGGGGACAACGCCACCTTCACCTGCAGCTTCTCCAACACATCGGAGAGCTTCGTGCTAAACTGGTACCGC	Endogenous	T017
PGC	GCTGGGGGAGTTCCTGAGGACCCACAAGTATGATCCTGCTTGGAAGTACCGCTTTGGTGACCTCAGCGTGACCTACGAGCCCATGGCCTACATGGATGCT	Endogenous	T018
PLA2R1	CTTCATGCCAGATGCAAGGAGGTACGCTGTTAAGTATTACAGATGAAACTGAAGAAAATTTCATAAGGGAGCACATGAGCAGTAAAACAGTGGAGGTGTG	Endogenous	T019
SATB2	TCGACACCGACAACAGACCTCCCTATTAAGGTGGACGGCGCCAACATCAACATCACAGCTGCCATTTATGACGAGATCCAACAGGAGATGAAAAGGGCCA	Endogenous	T020
TAGLN	GTGGGCGCTTGGGCTTCCAGGTCTGGCTGAAGAATGGCGTGATTCTGAGCAAGCTGGTGAACAGCCTGTACCCTGATGGCTCCAAGCCGGTGAAGGTGCC	Endogenous	T021
THBS2	AAACATCCTTGCAAATGGGTGTGACGCGGTTCCAGATGTGGATTTGGCAAAACCTCATTTAAGTAAAAGGTTAGCAGAGCAAAGTGCGGTGCTTTAGCTG	Endogenous	T022
TYMS	GTCAGTCTTTAGGGGTTGGGCTGGATGCCGAGGTAAAAGTTCTTTTTGCTCTAAAAGAAAAAGGAACTAGGTCAAAAATCTGTCCGTGACCTATCAGTTA	Endogenous	T023
VSIG1	CTTCCCCTGTGTACTACTGGCATAAACTTGAGGGAAGAGACATCGTGCCAGTGAAAGAAAACTTCAACCCAACCACCGGGATTTTGGTCATTGGAAATCT	Endogenous	T024

## Sheet: S4 pathology review concordanc
Table S4: original case versus pathology review diagnosis for all cases eligible for analysis
		Review diagnosis
		Benign	MBOT	MOC	LGIa	UGIa	Total
Case diagnosis	MBOT	17b	134				134
	MOC		90b,c	243			243
	LGI				55		55
	UGI					65	65
	Total	0	134	243	55	65	497
Mucinous borderline ovarian tumor (MBOT); mucinous ovarian carcinoma (MOC); lower gastrointestinal (LGI); upper gastrointestinal (UGI)
aIncludes samples from primary or metastatic tissue
bIncludes 107 cases included in survival analysis
c90 cases tested in diagnostic predictions

## Sheet: S5 GE and OS - GI
Table S5: Gene expression and overall survival in gastrointestinal tumor groups
Lower gastrointestinal					Upper gastrointestinal
	Univariate (n=57)		Multivariable (n=45)			Univariate (n=66)		Multivariable (n=65)
	HR (95% CI)	p	HR (95% CI)	p		HR (95% CI)	p	HR (95% CI)	p
MUC2	0.85 (0.74-0.97)	0.015	0.72 (0.55-0.95)	0.0204	MUC2	0.96 (0.91-1.02)	0.225
PD-1	0.79 (0.62-1.02)	0.0673			PD-1	0.75 (0.61-0.92)	0.00554	0.99 (0.75-1.30)	0.9328
CK20	0.86 (0.71-1.06)	0.155			CK20	0.84 (0.73-0.96)	0.00894	0.93 (0.81-1.07)	0.30276
TAGLN	0.98 (0.74-1.28)	0.858			TAGLN	1.34 (1.04-1.73)	0.0253	1.15 (0.85-1.55)	0.3727
ANXA10	1.10 (0.85-1.41)	0.473			ANXA10	0.88 (0.77-0.99)	0.0391	0.88 (0.77-1.01)	0.0801
THBS2	1.15 (0.89-1.49)	0.285			THBS2	1.25 (1.00-1.55)	0.0458	1.18 (0.86-1.63)	0.2974
CLDN18	1.01 (0.82-1.25)	0.895			CLDN18	0.90 (0.81-1.01)	0.065
ERBB2	0.88 (0.39-1.97)	0.756			ERBB2	0.77 (0.57-1.06)	0.108
DCN	1.03 (0.82-1.30)	0.793			DCN	1.15 (0.95-1.36)	0.126
MUC16	1.09 (0.96-1.26)	0.192			MUC16	1.05 (0.98-1.14)	0.167
SATB2	0.83 (0.49-1.40)	0.489			SATB2	0.80 (0.58-1.10)	0.171
GKN1	0.57 (0.22-1.51)	0.262			GKN1	0.79 (0.53-1.18)	0.245
PD-L1	0.85 (0.61-1.17)	0.318			PD-L1	1.03 (0.94-1.14)	0.518
MUC5AC	1.00 (0.90-1.12)	0.946			MUC5AC	1.04 (0.92-1.16)	0.541
PGC	0.92 (0.73-1.15)	0.468			PGC	0.98 (0.90-1.06)	0.549
PLA2R1	0.96 (0.62-1.50)	0.873			PLA2R1	1.10 (0.79-1.53)	0.559
TYMS	1.03 (0.63-1.70)	0.896			TYMS	1.09 (0.78-1.52)	0.625
MEP1A	0.89 (0.75-1.04)	0.148			MEP1A	0.98 (0.91-1.06)	0.637
VSIG1	1.07 (0.92-1.24)	0.394			VSIG1	0.99 (0.87-1.11)	0.813
Multivariable analyses adjusted for age, stage, tumor type, stratified by site

## Sheet: S6 Random Forest classes
Table S6: training and testing cohorts sampling
	9-gene classifier
Diagnosis group	Class total	Training	Testing
MBOT	134	120	14
MOC	241	120	121
UGI	3	2	1
LGI	19	14	5
	All genes
Diagnosis group	Class total	Training	Testing
MBOT	134	120	14
MOC I/II	192	120	72
MOC III/IV	36	26	10
UGI	62	52	10
LGI	55	45	10
	MBOT MOC analysis
Diagnosis group	Class total	Training	Testing
MBOT	139	125	14
MOC	246	125	14

## Sheet: S7 Random forest predictions
Table S7: results of random forest analysis, mean and standard deviation diagnostic predictions of 100 models from test set
all genes							9 genes, ovarian tissue							all genes, discordant MOC/MBOT predictions
	Model predicted diagnosis mean (sd)								Model predicted diagnosis mean (sd)						Model predicted diagnosis mean (sd)
	MBOT	MOC I/II	MOC III/IV	LGI	UGI				MBOT	MOC	LGI	UGI			MBOT	MOC
MBOT	11 (1.56)	2 (1.27)	0	1 (0.51)	1 (0.22)		Sample diagnosis	MBOT	9 (1.60)	4 (1.63)	1 (0.49)	0		MBOT	11 (1)	3 (1)
MOC I/II	16 (2.99)	52 (3.34)	1	2 (0.71)	3 (1.18)			MOC	41 (5.97)	77 (6.13)	3 (1.64)	0		MOC	3 (1)	11 (2)
MOC III/IV	3 (1.38)	5 (1.55)	0	1 (0.43)	2 (0.75)			LGI	2 (0.83)	2 (0.98)	2 (0.78)	0
LGI	1 (0.43)	1 (0.28)	0	9 (1.04)	1 (0.51)			UGI	0	1 (0)	0	0
UGI	2 (0.87)	2 (0.97)	1	1 (0.71)	6 (1.55)

## Sheet: S8 - HER2
Table S8: Clinical characteristics of HER2 high expressing/amplified cases
		HER2 high expression/amplified		HER2 low expression/non-amplified
		n	%	n	%
Tumor type	MBOT (n=134)	8	0.0597015	126	0.940299
	MOC (n=243)	64	0.263374	179	0.736626
MOC only						p-value
FIGO stage	I	36	0.258993	103	0.741007	0.144
	II	6	0.375	10	0.625
	III/IV	4	0.129032	27	0.870968
	unknown	18		39
Review grade	1	18	0.219512	64	0.780488	0.452
	2	24	0.272727	64	0.727273
	3	10	0.344828	19	0.655172
	unknown	12		32
Pattern of invasion	Expansile	50	0.306748	113	0.693252	0.008
	Infiltrative	4	0.102564	35	0.897436
	unknown	10		31

## Sheet: S9 - MBOT MOC predictions
Table S9 - Gene expression-based predictions of MOC and MBOT samples with a discordant diagnosis between original pathology and central pathology review
Discordant sample ID	case diagnosis	pathology review diagnosis	prediction
1	MOC	MBOT	MBOT
2	MOC	MBOT	MBOT
3	MOC	MBOT	MBOT
4	MOC	MBOT	MBOT
5	MOC	MBOT	MBOT
6	MOC	MBOT	MOC
7	MOC	MBOT	MOC
8	MOC	MBOT	MOC
9	MOC	MBOT	MOC
10	MOC	MBOT	MBOT
11	MOC	MBOT	MBOT
12	MOC	MBOT	MBOT
13	MOC	MBOT	MBOT
14	MOC	MBOT	MBOT
15	MOC	MBOT	MBOT
16	MOC	MBOT	MBOT
17	MOC	MBOT	MOC
18	MOC	MBOT	MBOT
19	MOC	MBOT	MOC
20	MOC	MBOT	MOC
21	MOC	MBOT	MOC
22	MOC	MBOT	MBOT
23	MOC	MBOT	MOC
24	MOC	MBOT	MOC
25	MOC	MBOT	MOC
26	MOC	MBOT	MBOT
27	MOC	MBOT	MOC
28	MOC	MBOT	MBOT
29	MOC	MBOT	MOC
30	MOC	MBOT	MOC
31	MOC	MBOT	MOC
32	MOC	MBOT	MOC
33	MOC	MBOT	MBOT
34	MOC	MBOT	MBOT
35	MOC	MBOT	MBOT
36	MOC	MBOT	MBOT
37	MOC	MBOT	MBOT
38	MOC	MBOT	MBOT
39	MOC	MBOT	MBOT
40	MOC	MBOT	MBOT
41	MOC	MBOT	MBOT
42	MOC	MBOT	MOC
43	MOC	MBOT	MBOT
44	MOC	MBOT	MOC
45	MOC	MBOT	MOC
46	MOC	MBOT	MBOT
47	MOC	MBOT	MBOT
48	MOC	MBOT	MOC
49	MOC	MBOT	MBOT
50	MOC	MBOT	MBOT
51	MOC	MBOT	MOC
52	MOC	MBOT	MOC
53	MOC	MBOT	MOC
54	MOC	MBOT	MOC
55	MOC	MBOT	MBOT
56	MOC	MBOT	MOC
57	MOC	MBOT	MBOT
58	MOC	MBOT	MOC
59	MOC	MBOT	MBOT
60	MOC	MBOT	MBOT
61	MOC	MBOT	MOC
62	MOC	MBOT	MOC
63	MOC	MBOT	MOC
64	MOC	MBOT	MBOT
65	MOC	MBOT	MOC
66	MOC	MBOT	MBOT
67	MOC	MBOT	MBOT
68	MOC	MBOT	MBOT
69	MOC	MBOT	MOC
70	MOC	MBOT	MBOT
71	MOC	MBOT	MBOT
72	MOC	MBOT	MBOT
73	MOC	MBOT	MBOT
74	MOC	MBOT	MBOT
75	MOC	MBOT	MOC
76	MOC	MBOT	MBOT
77	MOC	MBOT	MOC
78	MOC	MBOT	MBOT
79	MOC	MBOT	MBOT
80	MOC	MBOT	MOC
81	MOC	MBOT	MOC
82	MOC	MBOT	MBOT
83	MOC	MBOT	MBOT
84	MOC	MBOT	MBOT
85	MOC	MBOT	MBOT
86	MOC	MBOT	MBOT
87	MOC	MBOT	MBOT
88	MOC	MBOT	MOC
89	MOC	MBOT	MBOT
90	MOC	MBOT	MOC

## Sheet: S10 - matched set correlation
Table S10 - analysis of concordance between matched samples from the same patients
Set ID	Set.type	Sample 1 review pathology	Sample 2 review pathology	Pearsons*	Sample 1 cellularity	Sample 2 cellularity	Pathology concordant	Original case pathology	Matching cellularity
32	LGI.mets-LGI.mets	LGI.mets ovary	LGI.mets ovary	0.93	61-80%	41-60%	Y	LGI	No
1	LGI.mets-LGI.mets	LGI.mets omentum	LGI.mets small bowel	0.86	61-80%	41-60%	Y	LGI	No
33	LGI.mets-LGI.mets	LGI.mets ovary	LGI.mets ovary	0.79	21-40%	21-40%	N	MOC	Yes
3	LGI-LGI.mets	LGI colon	LGI.mets omentum	0.96	61-80%	21-40%	Y	LGI	No
4	LGI-LGI.mets	LGI appendix	LGI.mets ovary	0.95	21-40%	21-40%	Y	LGI	No
28	LGI-LGI.mets	LGI appendix	LGI.mets ovary	0.94	41-60%	21-40%	Y	LGI	No
17	MBOT-MBOT	MBOT ovary	MBOT ovary	0.99	21-40%	21-40%	N	MOC	Yes
18	MBOT-MBOT	MBOT ovary	MBOT ovary	0.96	41-60%	41-60%	N	MOC	Yes
30	MBOT-MBOT	MBOT ovary	MBOT ovary	0.96	41-60%	41-60%	Y	MBOT	Yes
20	MBOT-MBOT	MBOT ovary	MBOT ovary	0.95	21-40%	21-40%	N	MOC	Yes
25	MBOT-MBOT	MBOT ovary	MBOT ovary	0.95	41-60%	41-60%	Y	MBOT	Yes
29	MBOT-MBOT	MBOT ovary	MBOT ovary	0.93	41-60%	41-60%	Y	MBOT	Yes
19	MBOT-MBOT	MBOT ovary	MBOT ovary	0.93	61-80%	61-80%	N	MOC	Yes
9	MBOT-MBOT	MBOT ovary	MBOT ovary	0.88	21-40%	41-60%	N	MOC	No
8	MBOT-MBOT	MBOT ovary	MBOT ovary	0.86	41-60%	41-60%	N	MOC	Yes
10	MBOT-MBOT	MBOT ovary	MBOT ovary	0.85	21-40%	41-60%	N	MOC	No
16	MBOT-MBOT	MBOT ovary	MBOT ovary	0.79	41-60%	41-60%	N	MOC	Yes
21	MBOT-MBOT	MBOT ovary	MBOT ovary	0.52	41-60%	41-60%	Y	MBOT	Yes
8	MBOT-MBOT	MBOT ovary	MBOT ovary	0.44	21-40%	41-60%	N	MOC	No
15	MBOT-MBOT	MBOT ovary	MBOT ovary	0.43	21-40%	41-60%	N	MOC	No
5	MBOT-MBOT	MBOT ovary	MBOT ovary	0.42	41-60%	41-60%	N	MOC	Yes
7	MBOT-MBOT	MBOT ovary	MBOT ovary	0.34	41-60%	61-80%	Y	MBOT	No
23	MBOT-MOC	MBOT ovary	MOC ovary	0.99	41-60%	61-80%	N	MBOT	No
11	MBOT-MOC	MBOT ovary	MOC ovary	0.96	41-60%	41-60%	Y	MOC	Yes
27	MBOT-MOC	MBOT ovary	MOC ovary	0.96	41-60%	61-80%	N	MBOT	No
13	MBOT-MOC	MBOT ovary	MOC ovary	0.89	21-40%	41-60%	Y	MOC	No
26	MBOT-MOC	MBOT ovary	MOC ovary	0.76	41-60%	41-60%	Y	MOC	Yes
14	MBOT-MOC	MBOT ovary	MOC ovary	0.72	41-60%	61-80%	Y	MOC	No
24	MBOT-MOC	MBOT ovary	MOC ovary	0.4	41-60%	41-60%	Y	MOC	Yes
12	MOC-MOC	MOC ovary	MOC ovary	0.95	61-80%	61-80%	N	MBOT	Yes
2	UGI.mets-UGI.mets	UGI.mets ovary	UGI.mets ovary	0.99	41-60%	41-60%	N	MOC	Yes
22	UGI.mets-UGI.mets	UGI.mets ovary	UGI.mets ovary	0.62	41-60%	41-60%	Y	LGI	Yes
31	Benign-MBOT	benign ovary	MBOT ovary	0.57	21-40%	41-60%	N	MOC	No
*correlation between mRNA expression for all genes between matched samples

[truncated: 1 more sheets: S11- prognostic gene corr]
